# Supplementary material for: Rice (Oryza sativa L.) Grain Size, Shape, and Weight-Related QTLs Identified using GWAS with Multiple GAPIT Models and High-Density SNP Chip DNA Markers
Source: Preprints.org preprint supplement (doi:10.20944/preprints202309.1280.v1), 2023-09-20
Supplement: Supplementary file 3 [file supplementary]

Rice (*Oryza sativa* L.) Grain Size, Shape, and Weight-Related QTLs Identified using GWAS with Multiple GAPIT Models and High-Density SNP Chip DNA Markers

Nkulu Rolly Kabange 1,*, Gamenyah Daniel Dzorkpe2, Dong-Soo Park1, Youngho Kwon1, Sais-Beul Lee1, So-Myeong Lee1, Ju-Won Kang1, Seong-Gyu Jang1, Ki-Won Oh1 and Jong-Hee Lee 1,*

1 Department of Southern Area Crop Science, National Institute of Crop Science, RDA, Miryang 50424, Korea; [parkds9709@korea.kr](mailto:parkds9709@korea.kr) (D.-S.P.); [kwon6344@korea.kr](mailto:kwon6344@korea.kr) (Y.K.); [pappler@korea.kr](mailto:pappler@korea.kr) (S-B.L.); [olivetti90@korea.kr](mailto:olivetti90@korea.kr) (S.-M.L.); [kangjw81@korea.kr](mailto:kangjw81@korea.kr) (J.-W.K); [sgjang0136@korea.kr](mailto:sgjang0136@korea.kr) (S.-G.J.); [ohkw1004@korea.kr](mailto:ohkw1004@korea.kr) (K.-W.O)

2 Council for Scientific and Industrial Research (CSRI), Crops Research Institute, Kumasi, Ghana; [gamenyahdaniel@gmail.com](mailto:gamenyahdaniel@gmail.com)

***** Correspondence: [rollykabange@korea.kr](mailto:rollykabange@korea.kr) (N.R.K.), Tel.: +82-10-5413-4881; ccriljh@korea.kr; Tel: +82-53-350-1169; F.: +82-55-352-3059.

**Table S1.** Linked Markers to grain length, width, thickness, LWR, and thousand-grain weight.

| **Trait/QTL** | **SNP Chip Marker** | **Chr** | **Position (bp)** | ***P-value*** | **MAF** | **nobs** | **Effect** | **PVE (%)** | **Allele** |
| --- | --- | --- | --- | --- | --- | --- | --- | --- | --- |
| GL | BLINK |  |  |  |  |  |  |  |  |
| *qGL1-1BFSG* | AX-95918134 | 1 | 3820526 | 4.27E-15 | 0.02 | 143 | –3.54 | 72.5 | TTWH1 |
| *qGL11-1 BFSG* | AX-274862201 | 11 | 16356105 | 8.58E-24 | 0.06 | 143 | 2.35 | 31.9 | Ilpum |
| *qGL2-1BFSG* | AX-115751685 | 2 | 35100558 | 1.62E-10 | 0.34 | 143 | –0.66 | 22.9 | TTWH1 |
| *qGL3-1BF* | AX-154437636 | 3 | 2253428 | 1.72E-09 | 0.20 | 143 | 0.86 | 5.5 | Ilpum |
| *qGL2-2BF* | AX-154880023 | 2 | 35133528 | 2.88E-07 | 0.29 | 143 | –0.70 | 3.1 | TTWH1 |
| *qGL7-1BFSG* | AX-153903748 | 7 | 6690089 | 4.09E-12 | 0.44 | 143 | –0.79 | 2.6 | TTWH1 |
| *qGL1-2BF* | AX-279584700 | 1 | 41489588 | 6.18E-09 | 0.13 | 143 | –1.29 | 1.7 | TTWH1 |
| *qGL5BFSG* | AX-282746698 | 5 | 16169537 | 2.05E-09 | 0.19 | 143 | 0.72 | 1.4 | Ilpum |
|  | FarmCPU |  |  |  |  |  |  |  |  |
| *qGL1-1BFSG* | AX-95918134 | 1 | 3820526 | 2.49E-17 | 0.02 | 143 | –3.72 | 65.5 | TTWH1 |
| *qGL11-1 BFSG* | AX-274862201 | 11 | 16356105 | 6.86E-23 | 0.06 | 143 | 2.26 | 34.5 | Ilpum |
| *qGL11-2FSG* | AX-115751092 | 11 | 2823622 | 3.79E-07 | 0.08 | 143 | 0.93 | 14.0 | Ilpum |
| *qGL3-2Farm* | AX-154551783 | 3 | 8242439 | 5.58E-08 | 0.17 | 143 | –1.42 | 8.0 | TTWH1 |
| *qGL7-1BFSG* | AX-153903748 | 7 | 6690089 | 2.67E-09 | 0.44 | 143 | –0.73 | 7.6 | TTWH1 |
| *qGL2-1BFSG* | AX-115751685 | 2 | 35100558 | 1.36E-07 | 0.34 | 143 | –0.56 | 5.1 | TTWH1 |
| *qGL5-1BFSG* | AX-282746698 | 5 | 16169537 | 1.27E-08 | 0.19 | 143 | 0.67 | 4.3 | Ilpum |
| *qGL3-1BF* | AX-154437636 | 3 | 2253428 | 3.00E-09 | 0.20 | 143 | 0.76 | 3.8 | Ilpum |
| *qGL2-2BF* | AX-154880023 | 2 | 35133528 | 1.23E-06 | 0.29 | 143 | –0.64 | 3.2 | TTWH1 |
| *qGL1-2BF* | AX-279584700 | 1 | 41489588 | 2.95E-08 | 0.13 | 143 | –1.13 | 1.3 | TTWH1 |
|  | SUPER |  |  |  |  |  |  |  |  |
| *qGL1-1BFSG* | AX-95918134 | 1 | 3820526 | 4.27E-15 | 0.02 | 143 | –3.54 | 72.5 | TTWH1 |
| *qGL11-1 BFSG* | AX-274862201 | 11 | 16356105 | 6.86E-23 | 0.06 | 143 | 2.26 | 34.5 | Ilpum |
| *qGL11-2FSG* | AX-115751092 | 11 | 2823622 | 3.79E-07 | 0.08 | 143 | 0.93 | 14.0 | Ilpum |
| *qGL7-1BFSG* | AX-153903748 | 7 | 6690089 | 2.67E-09 | 0.44 | 143 | –0.73 | 7.6 | TTWH1 |
| *qGL2-1BFSG* | AX-115751685 | 2 | 35100558 | 1.36E-07 | 0.34 | 143 | –0.56 | 5.1 | TTWH1 |
| *qGL5-1BFSG* | AX-282746698 | 5 | 16169537 | 1.27E-08 | 0.18 | 143 | 0.67 | 4.3 | Ilpum |
|  | GLM |  |  |  |  |  |  |  |  |
| *qGL1-1BFSG* | AX-95918134 | 1 | 3820526 | 4.27E-15 | 0.02 | 143 | –3.54 | 72.5 | TTWH1 |
| *qGL11-1 BFSG* | AX-274862201 | 11 | 16356105 | 6.86E-23 | 0.06 | 143 | 2.26 | 34.5 | Ilpum |
| *qGL11-2FSG* | AX-115751092 | 11 | 2823622 | 3.79E-07 | 0.08 | 143 | 0.93 | 14.0 | Ilpum |
| *qGL7-1BFSG* | AX-153903748 | 7 | 6690089 | 2.67E-09 | 0.44 | 143 | –0.73 | 7.6 | TTWH1 |
| *qGL2-1BFSG* | AX-115751685 | 2 | 35100558 | 1.36E-07 | 0.34 | 143 | –0.56 | 5.1 | TTWH1 |
| *qGL5-1BFSG* | AX-282746698 | 5 | 16169537 | 1.27E-08 | 0.18 | 143 | 0.67 | 4.3 | Ilpum |
| GW | BLINK |  |  |  |  |  |  |  |  |
| *qGW1-1BFSG* | AX-273945773 | 1 | 5623288 | 8.36E-13 | 0.32 | 143 | 0.63 | 18.9 | Ilpum |
| *qGW2-1Blink* | AX-279699609 | 2 | 10805604 | 8.17E-18 | 0.10 | 143 | –1.16 | 14.9 | TTWH1 |
| *qGW1-3BF* | AX-115791785 | 1 | 43103625 | 9.44E-28 | 0.30 | 143 | –1.01 | 8.8 | TTWH1 |
| *qGW1-4Blink* | AX-281116133 | 1 | 20864932 | 1.52E-11 | 0.17 | 143 | 0.56 | 6.9 | Ilpum |
| *qGW6-1BF* | AX-115737727 | 6 | 28484619 | 5.27E-07 | 0.15 | 143 | 0.42 | 6.2 | Ilpum |
| *qGW3-1Blink* | AX-154073979 | 3 | 7895651 | 9.65E-08 | 0.33 | 143 | 0.46 | 4.8 | Ilpum |
| *qGW3-2Blink* | AX-115811160 | 3 | 14888685 | 6.12E-15 | 0.21 | 143 | 0.65 | 4.1 | Ilpum |
|  | FarmCPU |  |  |  |  |  |  |  |  |
| *qGW1-1BFSG* | AX-273945773 | 1 | 5623288 | 3.39E-09 | 0.32 | 143 | 0.57 | 15.5 | Ilpum |
| *qGW6-2FSG* | AX-273990782 | 6 | 13986482 | 2.45E-07 | 0.12 | 143 | –0.44 | 14.9 | TTWH1 |
| *qGW1-6Farm* | AX-280898927 | 1 | 2483022 | 2.66E-08 | 0.06 | 143 | –0.66 | 9.4 | TTWH1 |
| *qGW1-3BF* | AX-115791785 | 1 | 43103625 | 5.18E-10 | 0.30 | 143 | –0.44 | 8.7 | TTWH1 |
| *qGW6-1BF* | AX-115737727 | 6 | 28484619 | 5.27E-07 | 0.15 | 143 | 0.48 | 5.4 | Ilpum |
| *qGW12-1FSG* | AX-284265976 | 12 | 13013702 | 6.88E-08 | 0.10 | 143 | –0.39 | 4.2 | TTWH1 |
| *qGW8-1 FSG* | AX-115796459 | 8 | 3875546 | 2.89E-08 | 0.21 | 143 | 0.40 | 3.7 | Ilpum |
| *qGW2-3Farm* | AX-279994820 | 2 | 35461009 | 2.02E-06 | 0.15 | 143 | –0.68 | 3.5 | TTWH1 |
| *qGW2-4 Farm* | AX-154042022 | 2 | 24704256 | 1.30E-09 | 0.27 | 143 | 0.54 | 3.4 | Ilpum |
| *qGW3-3 Farm* | AX-154797543 | 3 | 2973374 | 4.00E-07 | 0.31 | 143 | 0.39 | 1.2 | Ilpum |
|  | SUPER |  |  |  |  |  |  |  |  |
| *qGW1-1BFSG* | AX-273945773 | 1 | 5623288 | 3.39E-09 | 0.32 | 143 | 0.57 | 15.5 | Ilpum |
| *qGW6-2FSG* | AX-273990782 | 6 | 13986482 | 2.45E-07 | 0.12 | 143 | –0.44 | 14.9 | TTWH1 |
| *qGW12-1FSG* | AX-284265976 | 12 | 13013702 | 6.88E-08 | 0.09 | 143 | –0.39 | 4.2 | TTWH1 |
| *qGW8-1 FSG* | AX-115796459 | 8 | 3875546 | 2.89E-08 | 0.21 | 143 | 0.40 | 3.7 | Ilpum |
|  | GLM |  |  |  |  |  |  |  |  |
| *qGW1-1BFSG* | AX-273945773 | 1 | 5623288 | 3.39E-09 | 0.32 | 143 | 0.57 | 15.5 | Ilpum |
| *qGW6-2FSG* | AX-273990782 | 6 | 13986482 | 2.45E-07 | 0.12 | 143 | –0.44 | 14.9 | TTWH1 |
| *qGW12-1FSG* | AX-284265976 | 12 | 13013702 | 6.88E-08 | 0.09 | 143 | –0.39 | 4.2 | TTWH1 |
| *qGW8-1 FSG* | AX-115796459 | 8 | 3875546 | 2.89E-08 | 0.21 | 143 | 0.40 | 3.7 | Ilpum |
| GT | BLINK |  |  |  |  |  |  |  |  |
| *qGT1Blink* | AX-279261704 | 1 | 18023142 | 3.10E-07 | 0.02 | 143 | –0.07 | 74.9 | TTWH1 |
|  | FarmCPU |  |  |  |  |  |  |  |  |
| *qGT2-1Farm* | AX-154787777 | 2 | 2118477 | 3.09E-11 | 0.03 | 143 | –0.13 | 54.9 | TTWH1 |
| *qGT2-2Farm* | AX-154913392 | 2 | 25105471 | 7.77E-09 | 0.29 | 143 | 0.03 | 5.3 | Ilpum |
| LWR | BLINK |  |  |  |  |  |  |  |  |
| *qLWR10Blink* | AX-115835839 | 10 | 22038978 | 5.11E-07 | 0.17 | 143 | 0.03 | 26.5 | Ilpum |
| *qLWR2-1BFSG* | AX-274833045 | 2 | 10000097 | 1.24E-07 | 0.06 | 143 | –0.09 | 15.2 | TTWH1 |
| *qLWR1-1BF* | AX-154960834 | 1 | 1595394 | 1.51E-12 | 0.41 | 143 | –0.04 | 13.5 | TTWH1 |
| *qLWR1-2Blink* | AX-115737888 | 1 | 600441 | 6.38E-09 | 0.15 | 143 | –0.06 | 10.7 | TTWH1 |
| *qLWR3Blink* | AX-154834762 | 3 | 8098398 | 6.51E-10 | 0.17 | 143 | –0.08 | 6.9 | TTWH1 |
|  | FarmCPU |  |  |  |  |  |  |  |  |
| *qLWR2-1BFSG* | AX-274833045 | 2 | 10000097 | 1.38E-08 | 0.06 | 143 | –0.11 | 32.9 | TTWH1 |
| *qLWR6-1FSG* | AX-115851421 | 6 | 10178858 | 1.54E-16 | 0.08 | 143 | 0.07 | 30.5 | Ilpum |
| *qLWR1-1BF* | AX-154960834 | 1 | 1595394 | 9.97E-11 | 0.41 | 143 | –0.04 | 13.2 | TTWH1 |
| *qLWR6-2FSG* | AX-155522120 | 6 | 30842264 | 1.26E-06 | 0.15 | 143 | –0.05 | 9.4 | TTWH1 |
| *qLWR8FSG* | AX-154176130 | 8 | 5398451 | 4.47E-07 | 0.15 | 143 | –0.04 | 5.9 | TTWH1 |
|  | SUPER |  |  |  |  |  |  |  |  |
| *qLWR2-1BFSG* | AX-274833045 | 2 | 10000097 | 1.24E-07 | 0.06 | 143 | –0.09 | 15.2 | TTWH1 |
| *qLWR6-1FSG* | AX-115851421 | 6 | 10178858 | 1.54E-16 | 0.08 | 143 | 0.07 | 30.5 | Ilpum |
| *qLWR6-2FSG* | AX-155522120 | 6 | 30842264 | 1.26E-06 | 0.15 | 143 | –0.05 | 9.4 | TTWH1 |
| *qLWR8FSG* | AX-154176130 | 8 | 5398451 | 4.47E-07 | 0.15 | 143 | –0.04 | 5.9 | TTWH1 |
|  | GLM |  |  |  |  |  |  |  |  |
| *qLWR2-1BFSG* | AX-274833045 | 2 | 10000097 | 1.24E-07 | 0.06 | 143 | –0.09 | 15.2 | TTWH1 |
| *qLWR6-1FSG* | AX-115851421 | 6 | 10178858 | 1.54E-16 | 0.08 | 143 | 0.07 | 30.5 | Ilpum |
| *qLWR6-2FSG* | AX-155522120 | 6 | 30842264 | 1.26E-06 | 0.15 | 143 | –0.05 | 9.3 | TTWH1 |
| *qLWR8FSG* | AX-154176130 | 8 | 5398451 | 4.47E-07 | 0.15 | 143 | –0.04 | 5.9 | TTWH1 |
| *TGW* | BLINK |  |  |  |  |  |  |  |  |
| *qTGW6BFSG* | AX-115737727 | 6 | 28484619 | 3.60E-10 | 0.15 | 143 | 0.88 | 32.8 | Ilpum |
| *qTGW2-1BF* | AX-279699609 | 2 | 10805604 | 4.19E-21 | 0.10 | 143 | –1.33 | 18. 6 | TTWH1 |
| *qTGW1-1Blink* | AX-154298059 | 1 | 5644298 | 2.56E-06 | 0.30 | 143 | 0.37 | 11.6 | Ilpum |
| *qTGW3-1BF* | AX-154471576 | 3 | 15332432 | 1.08E-10 | 0.06 | 143 | –0.93 | 10.7 | TTWH1 |
| *qTGW2-2BF* | AX-154096541 | 2 | 10773042 | 1.05E-11 | 0.17 | 143 | 0.83 | 7.8 | Ilpum |
| *qTGW1-2BFSG* | AX-154333920 | 1 | 5860250 | 1.95E-10 | 0.30 | 143 | 0.40 | 4.9 | Ilpum |
| *qTGW1-3BF* | AX-154810092 | 1 | 42931550 | 2.15E-17 | 0.26 | 143 | –0.62 | 4.03 | TTWH1 |
|  | FarmCPU |  |  |  |  |  |  |  |  |
| *qTGW6BFSG* | AX-115737727 | 6 | 28484619 | 9.95E-08 | 0.15 | 143 | 0.71 | 54.0 | Ilpum |
| *qTGW2-1BF* | AX-279699609 | 2 | 10805604 | 5.49E-15 | 0.10 | 143 | –0.98 | 27.9 | TTWH1 |
| *qTGW3-2Farm* | AX-123153600 | 3 | 7887961 | 2.47E-19 | 0.33 | 143 | 0.84 | 13.9 | Ilpum |
| *qTGW1-3BF* | AX-154810092 | 1 | 42931550 | 4.87E-17 | 0.26 | 143 | –0.58 | 8.3 | TTWH1 |
| *qTGW2-2BF* | AX-154096541 | 2 | 10773042 | 3.38E-10 | 0.17 | 143 | 0.72 | 7.5 | Ilpum |
| *qTGW3-1BF* | AX-154471576 | 3 | 15332432 | 4.98E-09 | 0.06 | 143 | –0.79 | 7.2 | TTWH1 |
| *qTGW1-2BFSG* | AX-154333920 | 1 | 5860250 | 1.41E-11 | 0.30 | 143 | 0.57 | 6.2 | Ilpum |
|  | SUPER |  |  |  |  |  |  |  |  |
| *qTGW6BFSG* | AX-115737727 | 6 | 28484619 | 9.95E-08 | 0.15 | 143 | 0.71 | 54.0 | Ilpum |
| *qTGW1-2BFSG* | AX-154333920 | 1 | 5860250 | 1.41E-11 | 0.30 | 143 | 0.57 | 6.2 | Ilpum |
|  | GLM |  |  |  |  |  |  |  |  |
| *qTGW6BFSG* | AX-115737727 | 6 | 28484619 | 9.95E-08 | 0.15 | 143 | 0.71 | 54.0 | Ilpum |
| *qTGW1-2BFSG* | AX-154333920 | 1 | 5860250 | 1.41E-11 | 0.30 | 143 | 0.57 | 6.2 | Ilpum |

GL: grain length, GW: grain width, GT: grain thickness, LWR: Length-to-width ratio, and TGW: thousand-grain weight. Chr: chromosome, MAF: minor allelic frequency, nobs: number of observations, PVE: phenotype variance explained. qTraitBlink: QTL detected by BLINK only, qTraitFarm: QTL detected by FarmCPU only, GLM, qTraitGlm: QTL detected by GLM only, qTraitFSG: QTL co-detected by FarmCPU, SUPER, and GLM, qTraitBFSG: QTL co-detected by BLINK, FarmCPU, SUPER, and GLM.


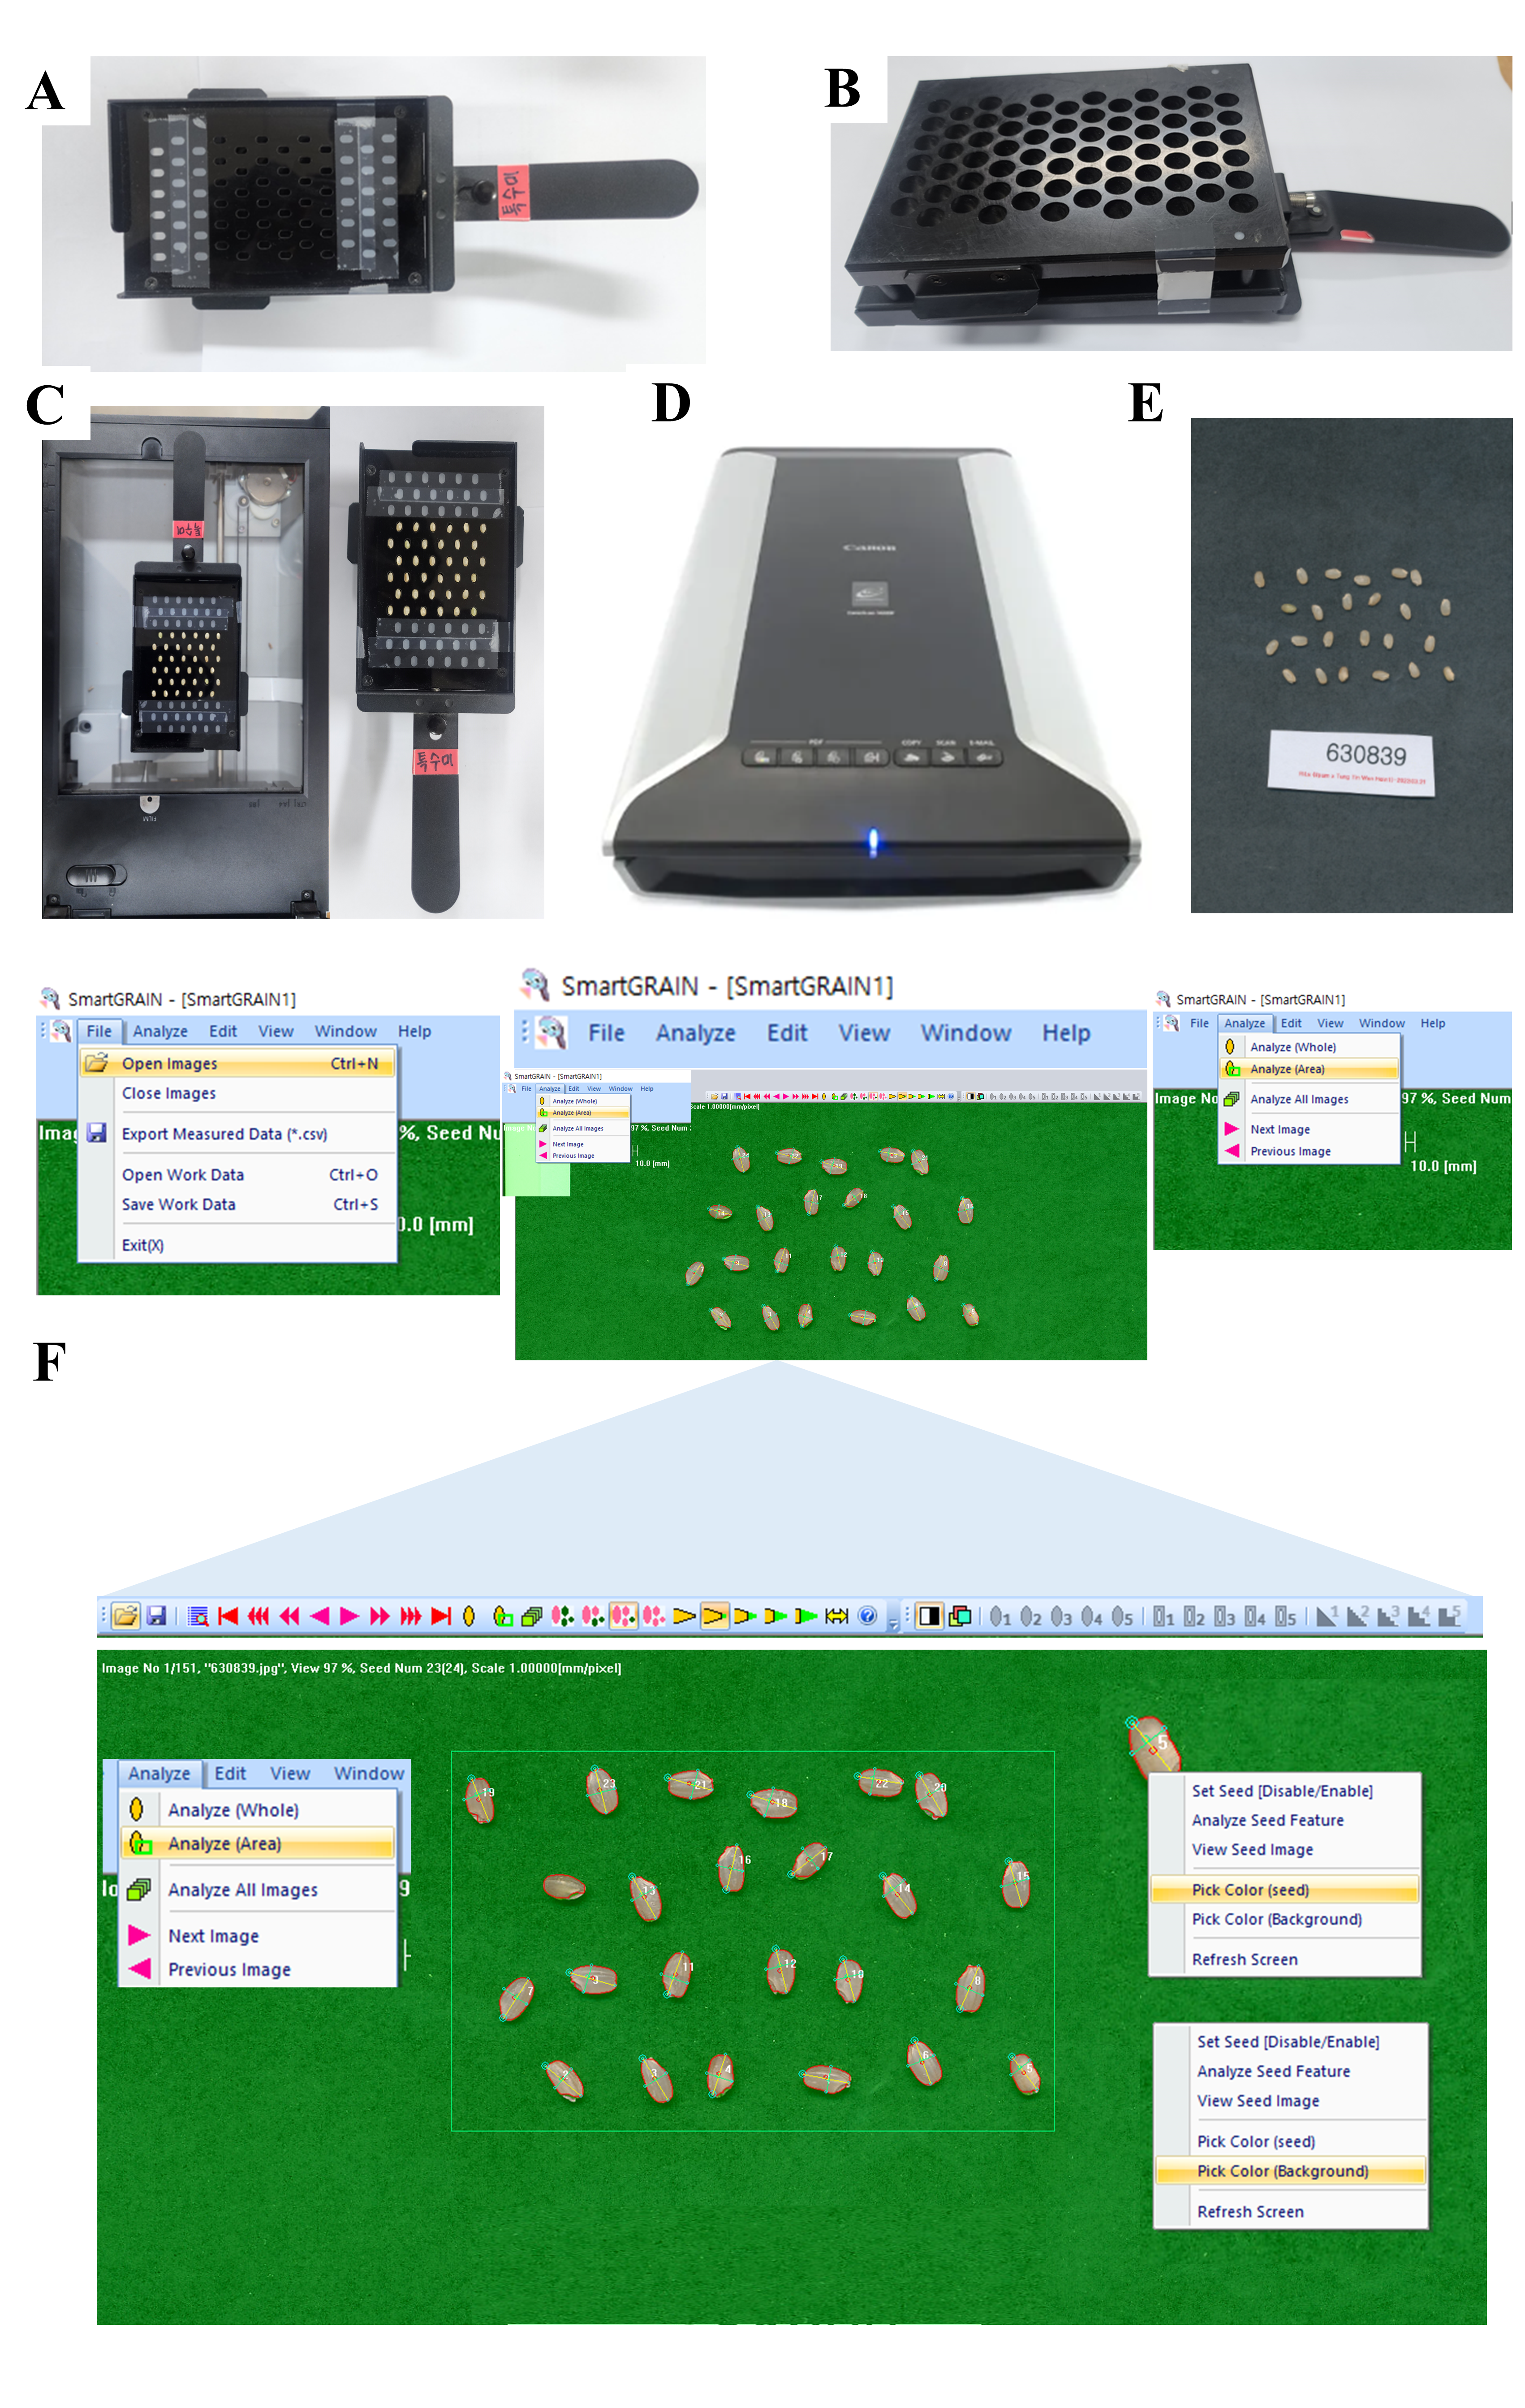


**Figure S1**. Illustration of rice grain length, width, and length-to-width ratio analysis using SMART GRAIN software. (**A**,**B**) Images of a rice grain dispenser, (**C**) A rice dispenser with rice grain on a scanner, (**D**,**E**) Scanner and scanned rice grains with a label, and (**F**) visualization of stepwise grain shape analysis.
